# Supplementary material for: Evaluation of Intraspecies Interactions in Biofilm Formation by Methylobacterium Species Isolated from Pink-Pigmented Household Biofilms
Source: PubMed Central journal article supplement (PMC4262362; doi:10.1264/jsme2.me14038), 2014-11-08

Supplemental figure legends

Fig. S1. Pink slimes collected from bathrooms in houses M and N. Black arrows indicate the formation of pink slimes.

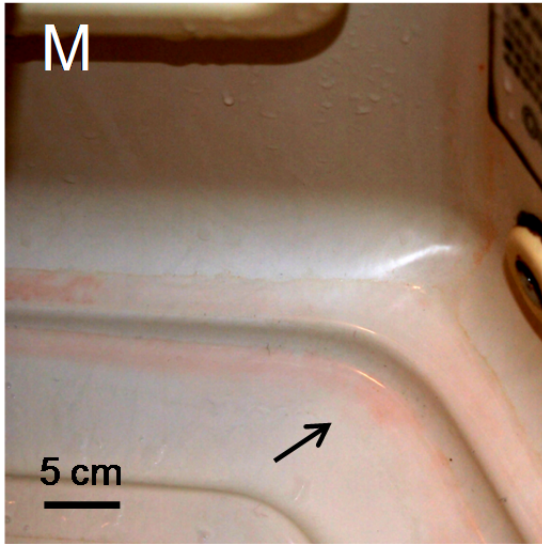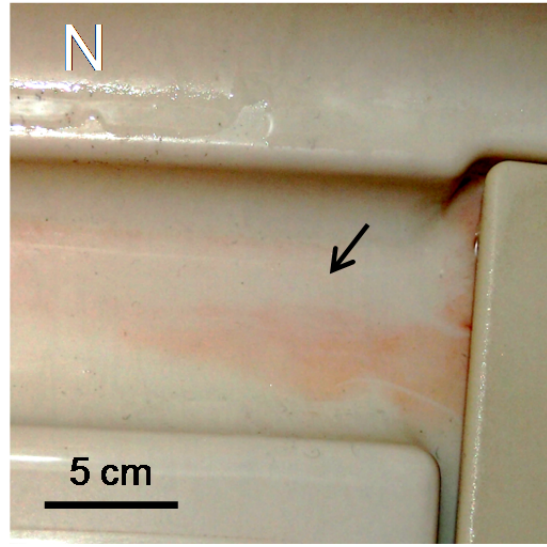

Supplement: 29_388_s1.pdf [file 29_388_s1.pdf]
